# Supplementary material for: Non-Chromatographic Speciation of As by HG Technique—Analysis of Samples with Different Matrices
Source: MDPI journal article supplement (doi:10.3390/molecules25214944), 2020-10-26
Supplement: s1 [file s1]

**Table 1S.**

Pre-concentration/separation methods to accomplish the speciation of inorganic As species by HG-based non-chromatographic techniques.

| Matrix                         | Species          | Procedure                                                                                                                                                                                                                                                                                                                | Detection  | LOD <sup>a</sup> , µg L <sup>-1</sup> | EF <sup>b</sup>            | Ref. |
|--------------------------------|------------------|--------------------------------------------------------------------------------------------------------------------------------------------------------------------------------------------------------------------------------------------------------------------------------------------------------------------------|------------|---------------------------------------|----------------------------|------|
| <b><i>CPE</i></b>              |                  |                                                                                                                                                                                                                                                                                                                          |            |                                       |                            |      |
| natural waters                 | As(III)<br>As(V) | Selective reaction between As(III) and Pyronine B in presence of SDS at pH 10 followed by extraction of As(III)-Pyronine B complex into Triton X-114. Total i-As was extracted after pre-reduction of As(V) to As(III) with Na <sub>2</sub> S <sub>2</sub> O <sub>3</sub> ; As(V) calculated by difference.              | HG-AAS     | 0.008                                 | 25.7                       | [18] |
| Lake water                     | As(III)<br>As(V) | Selective formation of As(III)-APDC (at pH 4.6) and As(V)-molybdate (at pH 2.4) complexes followed by extraction into Triton X-114. As species determined separately.                                                                                                                                                    | HG-AFS     | As(III): 0.009<br>As(V): 0.012        | As(III): 9.3<br>As(V): 7.9 | [23] |
| <b><i>DLLME</i></b>            |                  |                                                                                                                                                                                                                                                                                                                          |            |                                       |                            |      |
| Fruit juices                   | As(III)<br>As(V) | Selective reaction between As(III) and APDC at pH 3 followed by As(III)-APDC complex extraction into CCl <sub>4</sub> in dispersive medium (methanol). Total i-As was extracted after pre-reduction of As(V) to As(III) with Na <sub>2</sub> S <sub>2</sub> O <sub>3</sub> (pH 1.7-1.8); As(V) calculated by difference. | HG-AFS     | 1.2                                   |                            | [30] |
| <b><i>ATPS</i></b>             |                  |                                                                                                                                                                                                                                                                                                                          |            |                                       |                            |      |
| tap water                      | As(III)          | Selective extraction of As(III)-APDC at pH 6 using ATPS (electrolyte and polymer based) composed of L64 (copolymers) + Na <sub>2</sub> SO <sub>4</sub> + H <sub>2</sub> O.                                                                                                                                               | HG-ICP-OES | 0.20 (µg kg <sup>-1</sup> )           |                            | [84] |
| <b><i>co-precipitation</i></b> |                  |                                                                                                                                                                                                                                                                                                                          |            |                                       |                            |      |
| drinking water                 | As(III)<br>As(V) | Selective co-precipitation of As(III) with DBDTC at pH 2. After separation, the co-precipitated As(III)-DBDTC was dissolved with NaOH-H <sub>2</sub> O <sub>2</sub> . Total i-As was co-precipitated after pre-reduction of                                                                                              | HG-AFS     | 0.05                                  |                            | [5]  |

| As(V) to As(III) with KI-K <sub>2</sub> S <sub>2</sub> O <sub>7</sub> ; As(V) calculated by difference. |                  |                                                                                                                                                                                                                                                                                                      |        |                                  |                  |      |
|---------------------------------------------------------------------------------------------------------|------------------|------------------------------------------------------------------------------------------------------------------------------------------------------------------------------------------------------------------------------------------------------------------------------------------------------|--------|----------------------------------|------------------|------|
| <i>SPE</i>                                                                                              |                  |                                                                                                                                                                                                                                                                                                      |        |                                  |                  |      |
| natural waters                                                                                          | As(V)<br>As(III) | Selective adsorption of As(V) at pH 6 on aluminum hydroxide gel followed by dissolution in concentrated HCl and pre-reduction with thiourea-ascorbic acid. Total i-As was adsorbed after pre-oxidation of As(III) to As(V) with KMnO <sub>4</sub> ; As(III) calculated by difference.                | HG-AFS | 0.003                            | 167 <sup>c</sup> | [14] |
| natural waters                                                                                          | As(III)<br>As(V) | Selective reaction between As(III) and APDC with next retention of the As(III)-APDC complex on the column packed with cigarette filter. Total i-As was extracted after pre-reduction of As(V) to As(III) with thiourea-ascorbic acid; As(V) calculated by difference. Eluent: 1.68 M HCl.            | HG-AFS | 0.0074                           | 25.6             | [9]  |
| sea water                                                                                               | As(III)<br>As(V) | Selective formation of As(III)-APDC complex followed by its sorption on the mini-column contains PTFE particles as sorbent. Total i-As was extracted after pre-reduction of As(V) to As(III) with thiourea; As(V) calculated by difference. Eluent: 2 M HCl.                                         | HG-AAS | As(III): 0.02<br>As(V): 0.03     | 20.4             | [25] |
| natural waters                                                                                          | As(V)<br>As(III) | Selective sorption of As(V) at pH 3.5 on the G-COOH (column technique). Retained As(V) was eluted with 0.5 M NaOH and then pre-reduced to As(III) with KI-ascorbic acid. Total i-As was extracted after pre-oxidation of As(III) to As(V) with KMnO <sub>4</sub> ; As(III) calculated by difference. | HG-AAS | 0.0021                           | 50.3             | [4]  |
| natural waters                                                                                          | As(III)<br>As(V) | Selective formation and retention of the As(III)-APDC complex at pH 3 on the micro-column packed with SWCNTs followed by elution with 20% HNO <sub>3</sub> . Total i-As was extracted after pre-reduction of As(V) to As(III) with thiourea; As(V) calculated by difference.                         | HG-AFS | As(III): 0.0038<br>As(V): 0.0043 | 25.4             | [10] |

|                                       |                  |                                                                                                                                                                                                                                                                                                                          |            |                                  |                            |      |
|---------------------------------------|------------------|--------------------------------------------------------------------------------------------------------------------------------------------------------------------------------------------------------------------------------------------------------------------------------------------------------------------------|------------|----------------------------------|----------------------------|------|
| natural waters                        | As(V)<br>i-As    | As(V) was selectively separated from As(III) at pH 5.8 with the MWCNTs-BPEI packed mini-column. Retained As(V) was desorbed using 0.6% $\text{NH}_4\text{HCO}_3$ . Total i-As was extracted after pre-oxidation of As(III) to As(V) with $\text{H}_2\text{O}_2$ .                                                        | HG-AFS     | As(V): 0.014                     | 16.3                       | [26] |
| natural waters                        | As(V)<br>As(III) | As(V) sorbs selectively at pH 3 on the nano $\text{ZrO}_2/\text{B}_2\text{O}_3$ hybrid sorbent (column technique) and then desorbs by 3 M HCl followed by pre-reduction with KI-ascorbic acid. Total i-As was extracted after pre-oxidation of As(III) to As(V) with $\text{KMnO}_4$ . As(III) calculated by difference. | HG-AAS     | 0.00925                          | 20                         | [16] |
| natural waters                        | As(III)<br>As(V) | Selective sorption of As(III) and As(V) at pH 4 in two knotted reactors filled with PSTH-MNPs followed by elution using 7% $\text{HNO}_3$ –0.1% thiourea–2.8% L-cysteine and selective HG for As(III) and i-As. As(V) calculated by difference.                                                                          | HG-ICP-MS  | As(III): 0.0027<br>As(V): 0.0032 | As(III): 1.9<br>As(V): 2.1 | [11] |
| natural waters                        | As(III)<br>As(V) | Selective biosorption of As(III) into the baker's yeast ( <i>Saccharomyces cerevisiae</i> ). At pH 7 As(III) was accumulated by the yeast cells, while As(V) remained in solution. After separation, the solid phase was prepared to be slurry for determination. As species determined in separate phases.              | HG-ICP-AES | As(III): 0.1<br>As(V): 0.5       | 7 <sup>c</sup>             | [8]  |
| herbicide,<br>pesticide,<br>cigarette | As(V)<br>As(III) | Selective biosorption of As(V) using column packed with yeast ( <i>Saccharomyces cerevisiae</i> ) immobilized on the CPG. At pH 7 As(V) sorbs selectively, whereas As(III) was not retained and passed directly through the column. Both As(III) and As(V) determined separately. Eluent: 3 M $\text{HNO}_3$ .           | HG-ICP-AES |                                  |                            | [37] |

|                  |          |                                                                                                                        |        |       |                          |      |
|------------------|----------|------------------------------------------------------------------------------------------------------------------------|--------|-------|--------------------------|------|
| ground water     | As(V)    | Selective retention of As(V) on the ESM at pH 11. Eluent: 2 M HNO <sub>3</sub> .                                       | HG-AFS | 0.001 | 33.3                     | [21] |
| rice products,   | i-As (as | Strong anion exchange (SAX) cartridges for selective sorption of i-As                                                  | HG-AAS |       | 0.02 mg kg <sup>-1</sup> | [41] |
| marine organism, | As(V))   | coexisting with o-As at pH 6. Eluent: 0.4 M HNO <sub>3</sub> [41] or 0.5 M HCl                                         | HG-AFS |       | 0.08 mg kg <sup>-1</sup> | [79] |
| rice             |          | [42,79].                                                                                                               |        |       | 1.3 ng g <sup>-1</sup>   | [42] |
| marine algae     | i-As (as | Polystyrene (PS) resin cartridge for selective sorption of AsBr <sub>3</sub> [55] or                                   | HG-AFS |       | 3.0 ng g <sup>-1</sup>   | [55] |
|                  | As(III)) | AsCl <sub>3</sub> [43] coexisting with As-sugars and/or o-As under strongly acidic condition. Eluent: H <sub>2</sub> O |        |       | 1.1 ng g <sup>-1</sup>   | [43] |

APDC: ammonium pyrrolidinedithiocarbamate. ATPS: liquid-liquid extraction of aqueous two-phase systems. DBDTC: dibenzylthiocarbamate. DLLME: dispersive liquid-liquid microextraction. SDS: sodium dodecyl sulfate. CPE: cloud point extraction. CPG: controlled pore glass. ESM: eggshell membrane. G-COOH: carboxylated nanoporous grapheme. HG-AAS: hydride generation atomic absorption spectrometry. HG-AFS: hydride generation atomic fluorescence spectrometry. HG-ICP-AES: hydride generation inductively-coupled plasma atomic emission spectrometry. HG-ICP-OES: hydride generation inductively-coupled plasma optical emission spectrometry. HG-ICP-MS: hydride generation inductively-coupled plasma mass spectrometry. i-As: the inorganic tri- and pentavalent As species (As(III) and As(V)). M: mol L<sup>-1</sup>. MWCNTs-BPEI: multi-walled carbon nanotubes functionalized with branched cationic polyethyleneimine. o-As: the organic, i.e. methylated pentavalent As species (DMA and MMA). PSTH-MNPs: magnetic ferrite (Fe<sub>3</sub>O<sub>4</sub>) nanoparticles functionalized with [1,5-bis (2-pyridyl) 3-sulfonophenylmethylene] thiocarbonohydrazine. PTFE: polytetrafluoroethylene. SWCNTs: single-walled carbon nanotubes.

<sup>a</sup> For As(V) as As(III) without or after previous pre-reduction step.

<sup>b</sup> Enrichment factor: the ratio of the slopes of the calibration curves for As with and without pre-concentration.

<sup>c</sup> Pre-concentration factor: the ratio of initial to final volume of enriched solution after pre-concentration.
